# Supplementary material for: Vertical dependence of horizontal variation of cloud microphysics: observations from the ACE-ENA field campaign and implications for warm-rain simulation in climate models
Source: Copernicus journal article supplement (doi:10.5194/acp-21-3103-2021), 2021-03-02
Supplement: Supplementary file 1 [file acp-21-3103-2021-supplement.pdf]

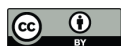

*Supplement of*

**Vertical dependence of horizontal variation of cloud microphysics:  
observations from the ACE-ENA field campaign and implications  
for warm-rain simulation in climate models**

**Zhibo Zhang et al.**

*Correspondence to:* Zhibo Zhang (zhibo.zhang@umbc.edu)

The copyright of individual parts of the supplement might differ from the CC BY 4.0 License.

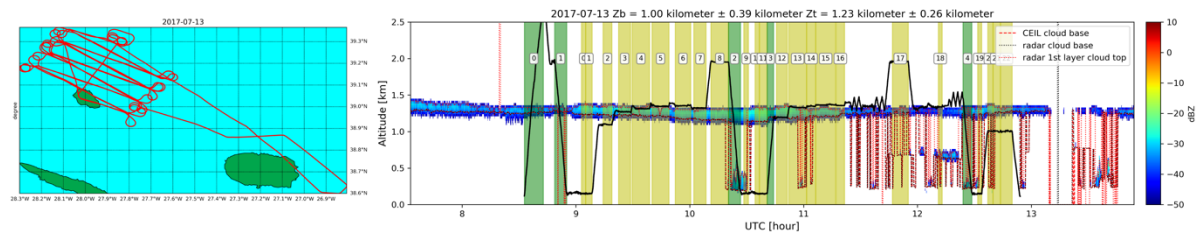

Figure S1 Same as Figure 1 of the paper, except for RF 2017-07-13

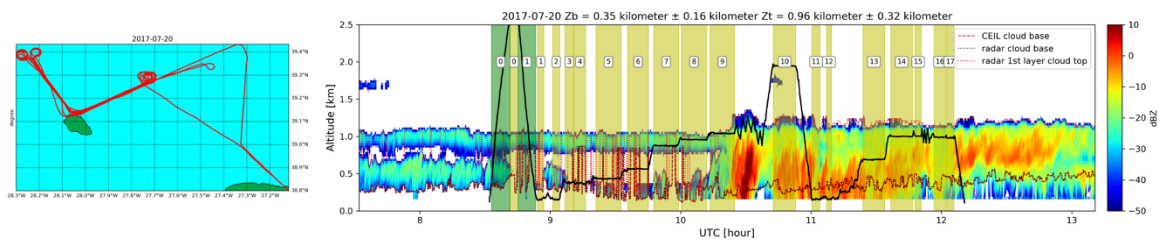

Figure S2 Same as Figure 1 of the paper, except for RF 2017-07-20

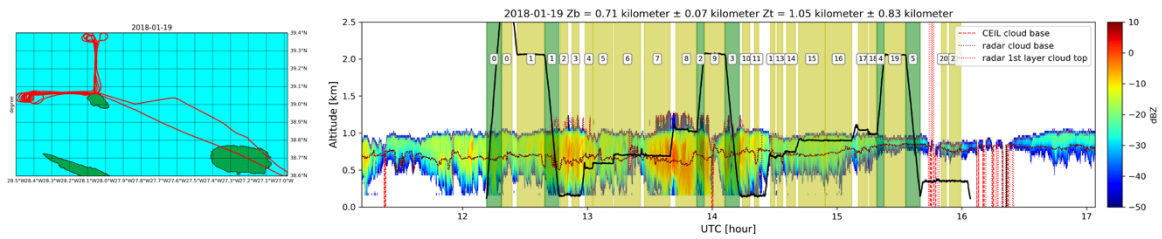

Figure S3 Same as Figure 1 of the paper, except for RF 2018-01-19

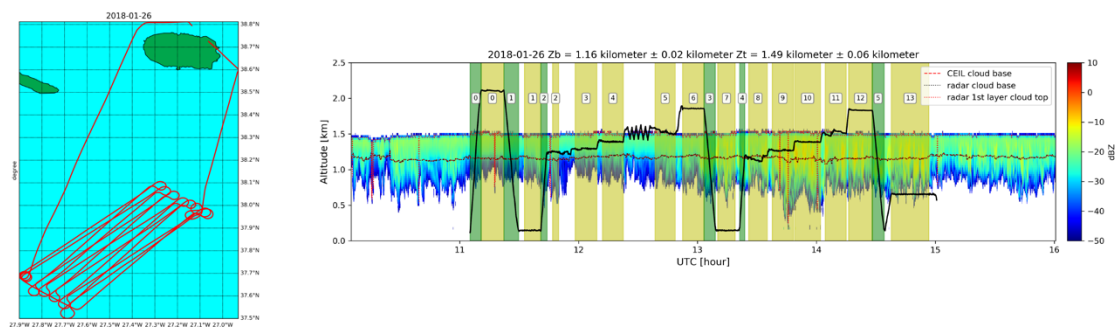

Figure S4 Same as Figure 1 of the paper, except for RF 2018-01-26

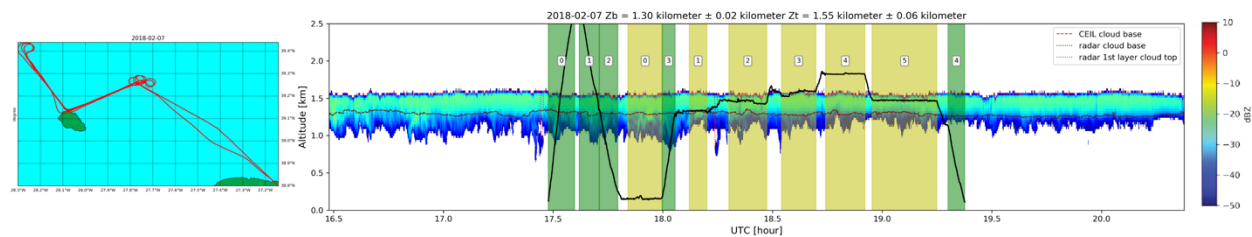

Figure S5 Same as Figure 1 of the paper, except for RF 2018-02-07

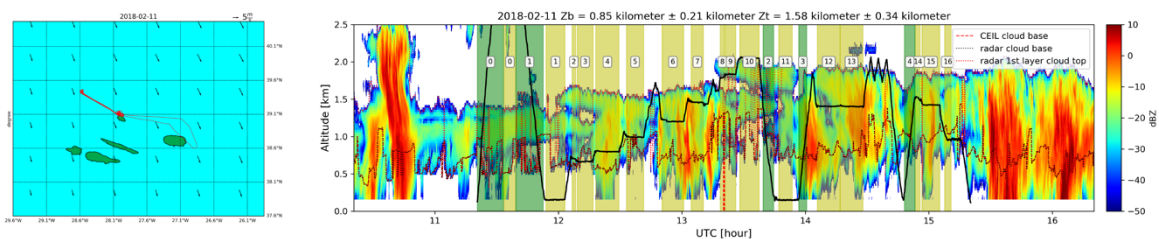

Figure S6 Same as Figure 1 of the paper, except for RF 2018-02-11
